# Supplementary material for: Knock-Down of a Tonoplast Localized Low-Affinity Nitrate Transporter OsNPF7.2 Affects Rice Growth under High Nitrate Supply
Source: PubMed Central journal article supplement (PMC5078692; doi:10.3389/fpls.2016.01529), 2016-10-25
Supplement: Data_Sheet_1.pdf [file Data_Sheet_1.pdf]

*Supplementary Material*

**Knock-down of a tonoplast localized low-affinity nitrate transporter *OsNPF7.2* affects rice growth under high nitrate supply**

**Rui Hu<sup>1,2,&</sup>, Diyang Qiu<sup>1,2,&</sup>, Yi Chen<sup>3</sup>, Anthony J Miller<sup>3</sup>, Xiaorong Fan<sup>4</sup>, Xiaoping Pan<sup>1</sup> and Mingyong Zhang<sup>1\*</sup>**

**\* Correspondence:**  
[zhangmy@scbg.ac.cn](mailto:zhangmy@scbg.ac.cn)

**Supplementary Figure legends**

Figure S1

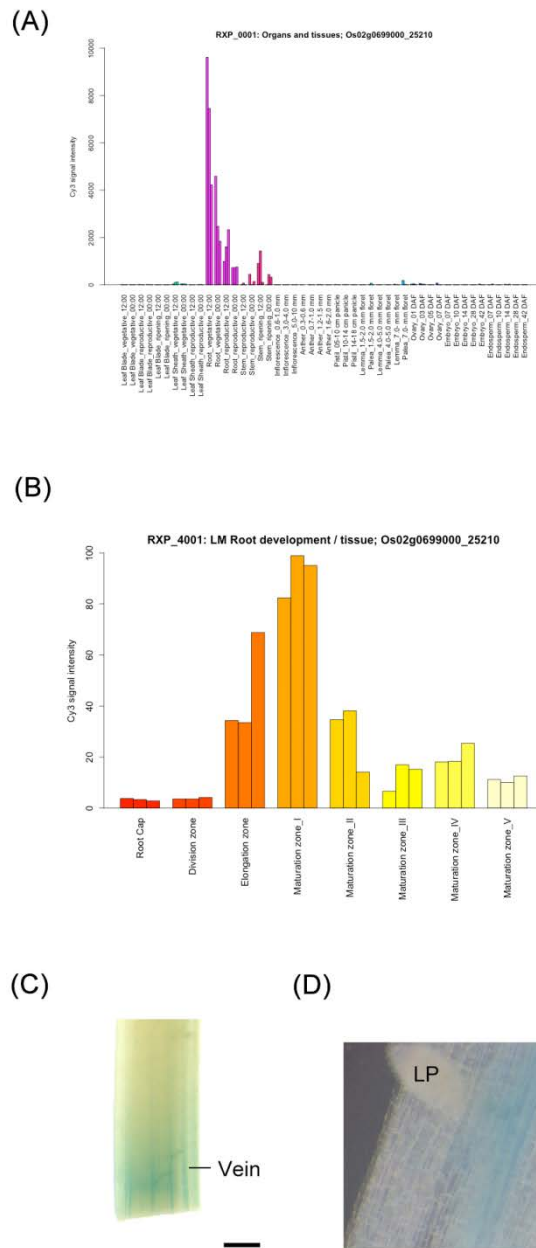

**Figure S1. Tissue Expression pattern of *OsNPF7.2*.** The gene is mainly expressed in the rice root elongation zone and mature zone. (A) Organ and tissue expression data of *OsNPF7.2* from RiceXPro. (B) Root development and tissue expression data of *OsNPF7.2* from RiceXPro. (C) and (D) Gus staining of *P<sub>OsNPF7.2</sub>: GUS* in leaf (C) and lateral root primordium (D). Leaf and root were stained overnight. LP, lateral root primordium. Bar = 1 mm in (C) and 2 mm in (D).

Figure S2

(A)

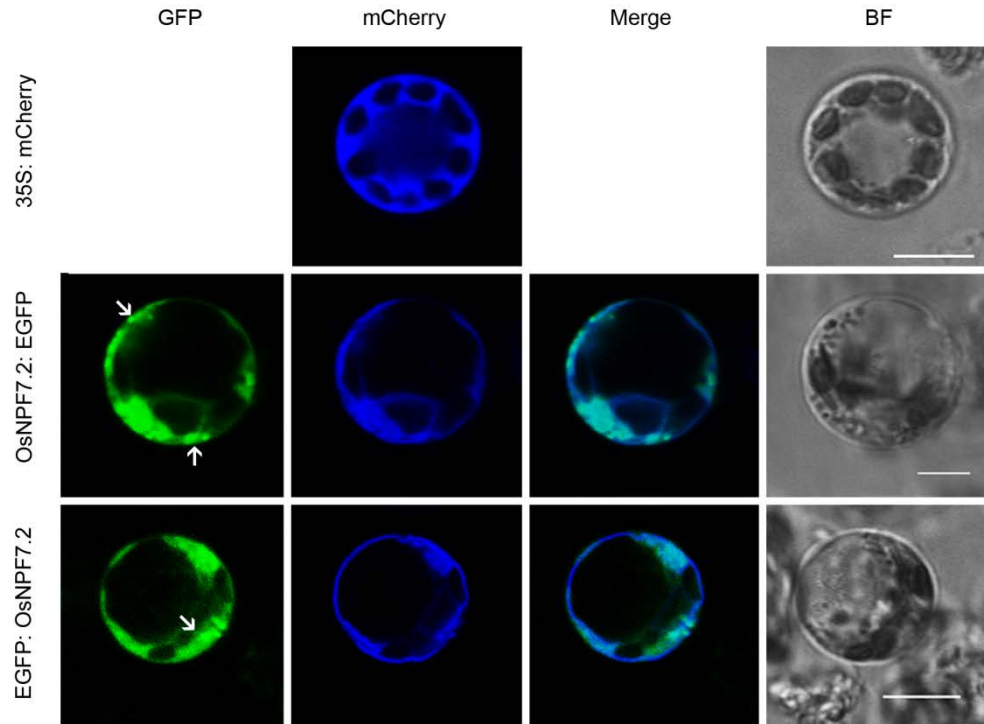

(B)

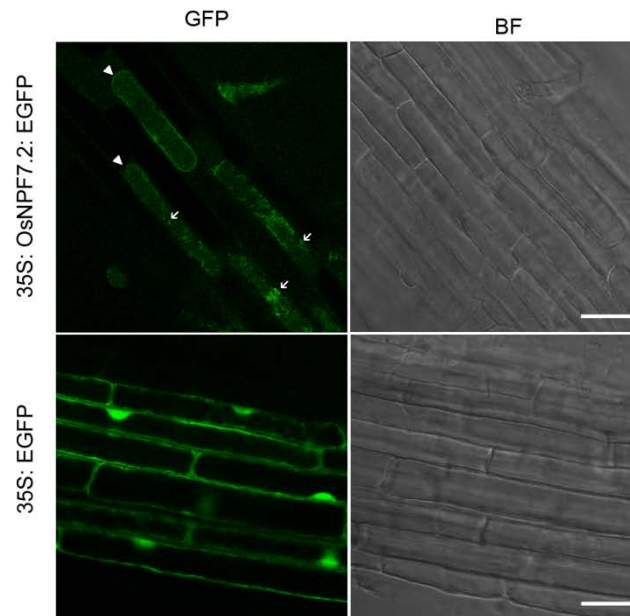

**Figure S2. OsNPF7.2 is mainly localized on the tonoplast.** (A) Co-localization of 35S: *OsNPF7.2: EGFP* with a tonoplast localized marker 35S: *OsTPKa: mCherry*. The images were coded green for GFP and blue for mCherry. Arrows indicate the small vacuoles. Scale bars are 7.5 μm, 5 μm, and 7.5 μm from upper to lower panels. TPKa is localized on lytic vacuole membrane of rice aleurone (Isayenkov *et al.*, 2011). For 35S: *OsTPKa: mCherry* construction, the *mCherry* was cloned from the *vac-rk* (Nelson *et al.*, 2007) and substituted the *nEYFP* of *pSAT1A-nEYFP-N1* via *Xba*I and

*KpnI*, then the CDS of *OsTPKa* was fused to *mCherry* via *XhoI* and *EcoRI*. Moreover, a linker (GGGS)<sub>2</sub> was inserted between the CDS of *OsTPKa* and *mCherry*. **(B)** Localization of OsNPF7.2 in rice root. Arrowheads indicate the larger vacuole. Arrows indicate the small vacuoles. Scare bars are both 20 μm. *OsNPF7.2:EGFP* fusion protein was drove by 35S promoter and inserted into *pCAMBIA1301* to generate transgenic plants. Positive control was generated by 35S: *EGFP* cloned into *pCAMBIA1301*. Roots of the transgenic plants were observed with confocal laser scanning microscope (Leica TCS SP5, Germany) with 488 nm exciting wavelength for GFP.

Figure S3

(A)

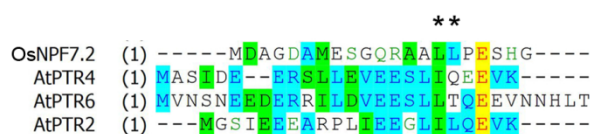

(B)

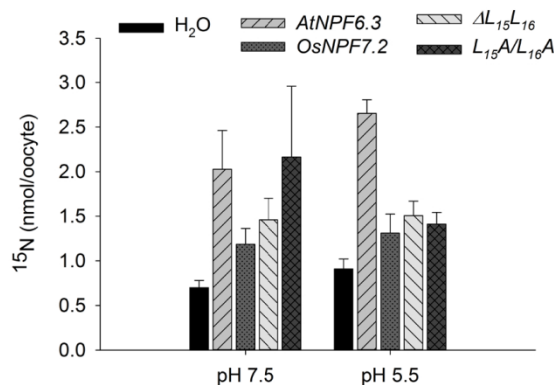

**Figure S3. Mutation of the tonoplast-localization motif of OsNPF7.2 has no effect on nitrate uptake in *Xenopus* oocytes.** (A) EX<sub>6</sub>LL motif on N terminal of OsNPF7.2. Asterisks indicate the L<sub>15</sub>L<sub>16</sub> of the motif. (B) Nitrate uptake of the L<sub>15</sub>L<sub>16</sub> mutation of OsNPF7.2. ΔL<sub>15</sub>L<sub>16</sub> is the construct with a deletion of L<sub>15</sub>L<sub>16</sub> of OsNPF7.2. L<sub>15</sub>A/L<sub>16</sub>A is the construct mutated L<sub>15</sub> to A and L<sub>16</sub> to A of OsNPF7.2. For the mutation L<sub>15</sub>A/L<sub>16</sub>A and deletion ΔL<sub>15</sub>L<sub>16</sub> of *OsNPF7.2*, overlapping PCR was used and the mutated sequences were cloned to the *pT7Ts-OsNPF7.2* via the *HindIII* and *NotI*. Data represent mean±SD (n=5).

Figure S4

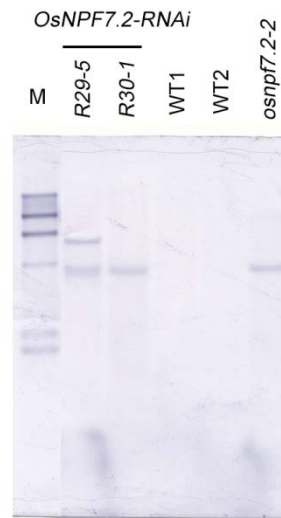

**Figure S4. Southern blot analysis of *OsNPF7.2-RNAi* plants and *osnpf7.2-2*.** Genomic DNAs were digested with *Hind*III and *Bam*HI, and hybridized to a probe of approximately 800-bp sequence from *Hpt* of T-DNA. R, RNAi lines; M, DNA Molecular-Weight Marker II DIG Labeled (Roche, Switzerland).

Figure S5

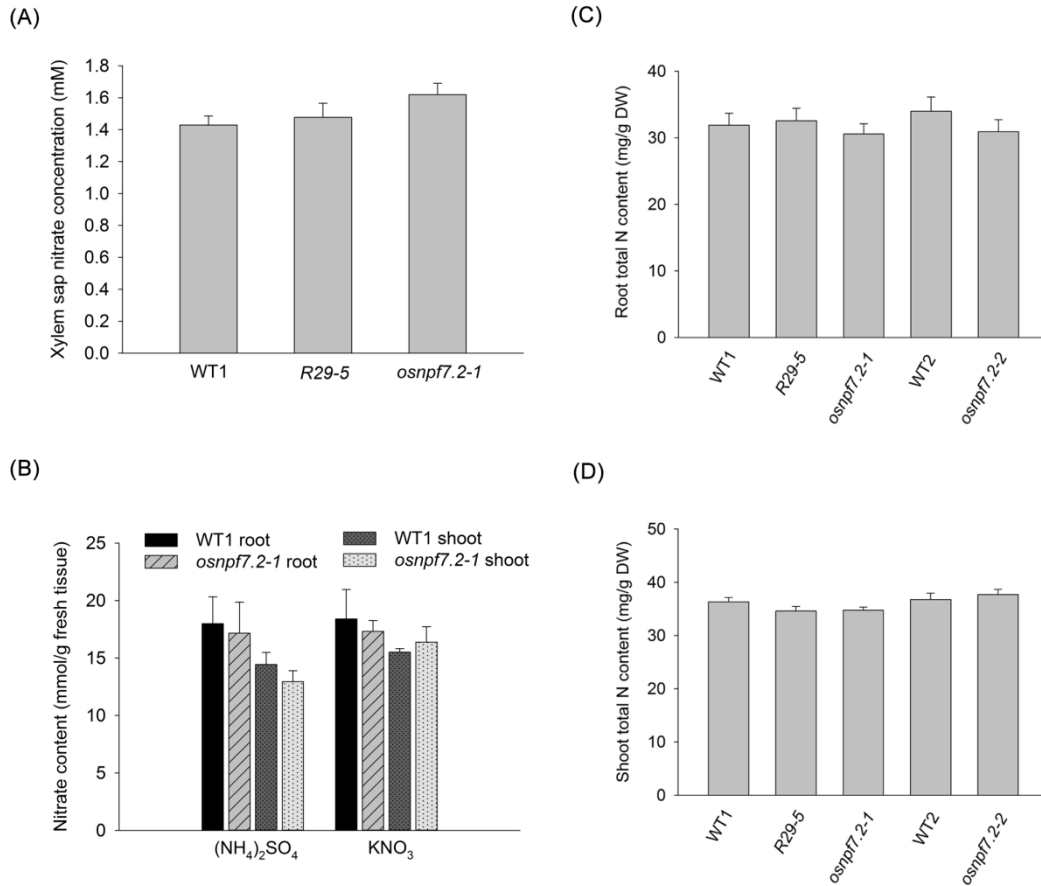

**Figure S5. Knock-down plants of *OsNPF7.2* have no differences of xylem sap nitrate concentration, total N content, and tissue nitrate content compared with wild type.** (A) Nitrate concentration in xylem sap. Six-week seedlings placed under N-starvation for 3 d, and then transferred to IRRI solution containing 5 mM  $\text{Ca}(\text{NO}_3)_2$ . Plants were cut 4 cm above roots immediately and xylem sap collected for 2 h. Data represent mean $\pm$ SE (n=6). (B) Nitrate content in root and shoot. Two-week seedlings were N starved for 4 d, and transferred to IRRI solution containing 20 mM  $\text{KNO}_3$  or 10 mM  $(\text{NH}_4)_2\text{SO}_4$  for 24 h, then washed to measure nitrate content by HPLC. Data are mean $\pm$ SE (n=12) from three replicates. (C) and (D) Total N content in roots and shoots. Six-week seedlings were transferred to IRRI solution containing 10 mM  $\text{KNO}_3$  for 24 h, roots and shoots were separated to measure the total N content. Data represent mean $\pm$ SE (n=3). Significant differences ( $P<0.05$ ) between knock-down plants and their corresponding wild-type plants were calculated through LSD-test following one-way ANOVA.

Figure S6

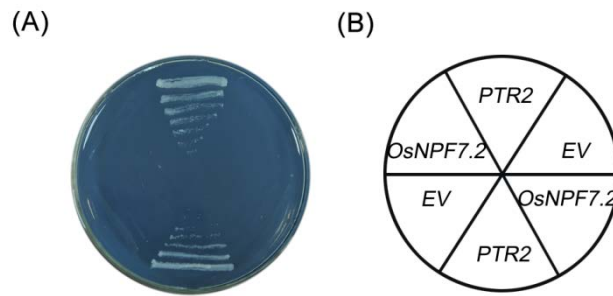

**Figure S6. *OsNPF7.2* does not rescue growth of *Saccharomyces cerevisiae ptr2* mutant.** Complementation of a *ptr2* mutant strain ABC738 deficient in the uptake of leucine. *EV* is empty vector *pYES260*. *ScPTR2* is positive control from *S. cerevisiae*. The *pYES260* (Melcher, 2000) with modified multi cloning site (MCS) was used as the backbone for all the yeast expression vectors. For *pYES260-OsNPF7.2*, the CDS of *OsNPF7.2* was cloned into *pYES260* via *HindIII* and *XbaI*. For *pYES260-PTR2*, the CDS of *PTR2* from yeast genomic DNA was cloned into *pYES260* via *BamHI* and *XbaI*. *Saccharomyces cerevisiae* strain ABC738 (*MATa ura3-52 leu2-Δ1 lys2-801 his3-Δ200 trp1-Δ63 ade2-101 ptr2Δ::KanMX2*) was transformed according to Yeastmaker™ Yeast Transformation System 2 User Manual (Clontech, USA), and the transformants were selected on SC-Ura medium. To test peptide transport activity, the transformants were selected on SC-Ura/-Leu medium containing galactose as carbon source and 1mM Pro-Leu as sole source of the required amino acid leucine.

## Reference

- Isayenkov, S., Isner, J.-C., and Maathuis, F. J. M. (2011). Rice two-pore K<sup>+</sup> channels are expressed in different types of vacuoles. *Plant Cell*. 23, 756-768. DOI: 10.1105/tpc.110.081463
- Melcher, K. (2000). A modular set of prokaryotic and eukaryotic expression vectors. *Analytical Biochemistry*. 277, 109-120. DOI: 10.1006/abio.1999.4383
- Nelson, B. K., Cai, X., and Nebenfuhr, A. (2007). A multicolored set of in vivo organelle markers for co-localization studies in *Arabidopsis* and other plants. *Plant Journal*. 51, 1126-1136. DOI: 10.1111/j.1365-313X.2007.03212.x
